# Supplementary material
Source: PubMed Central journal article supplement (PMC7189280)
Supplement: advancesADV2020001579-suppl1.pdf [file advancesADV2020001579-suppl1.pdf]

## SUPPLEMENTAL DATA

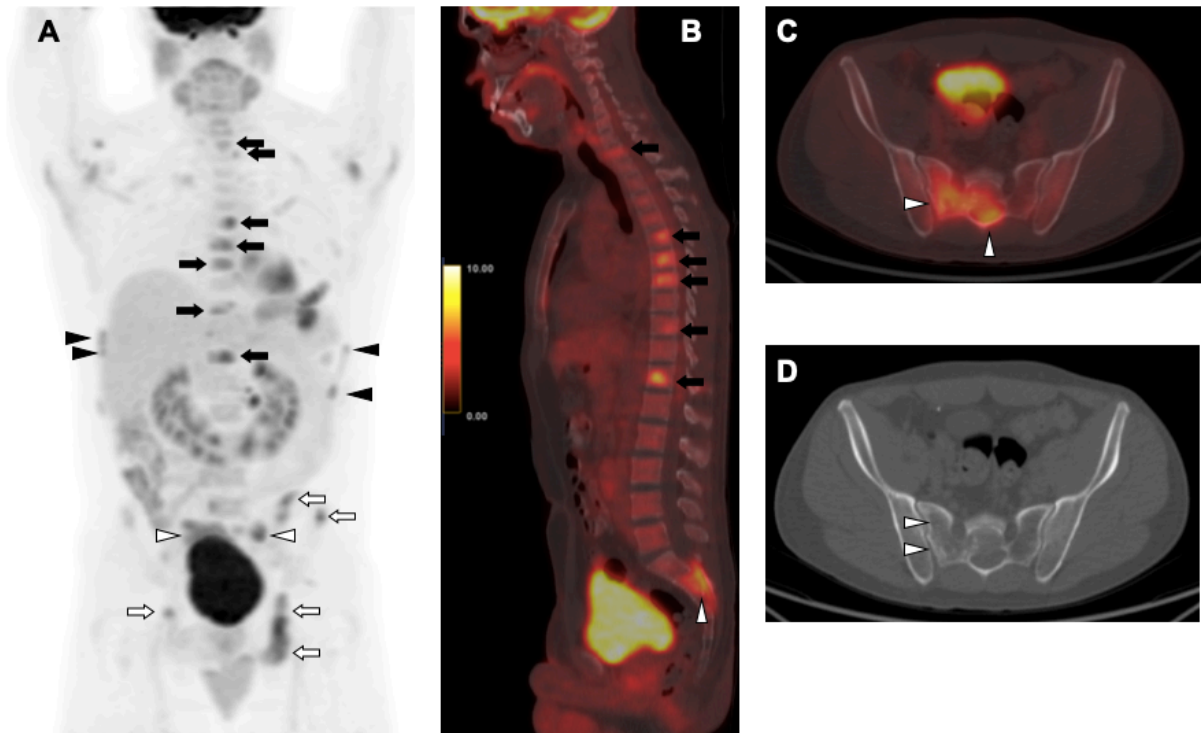

**Supplemental Figure 1.** 45-year-old male diagnosed with follicular lymphoma involving bone marrow. FDG PET-CT (A; MIP) showed intensely increased FDG uptake at several vertebral bodies (arrows, B, C; Fused PET-CT images), multiple ribs (black arrowheads), pelvic bones (white arrows) and bilateral scapula (white arrowheads, D; CT axial). Patient underwent targeted biopsy of a PET/CT detected lesion (right sacrum), which confirmed bone marrow involvement (BMI), whereas routine iliac crest biopsy did not show BMI.

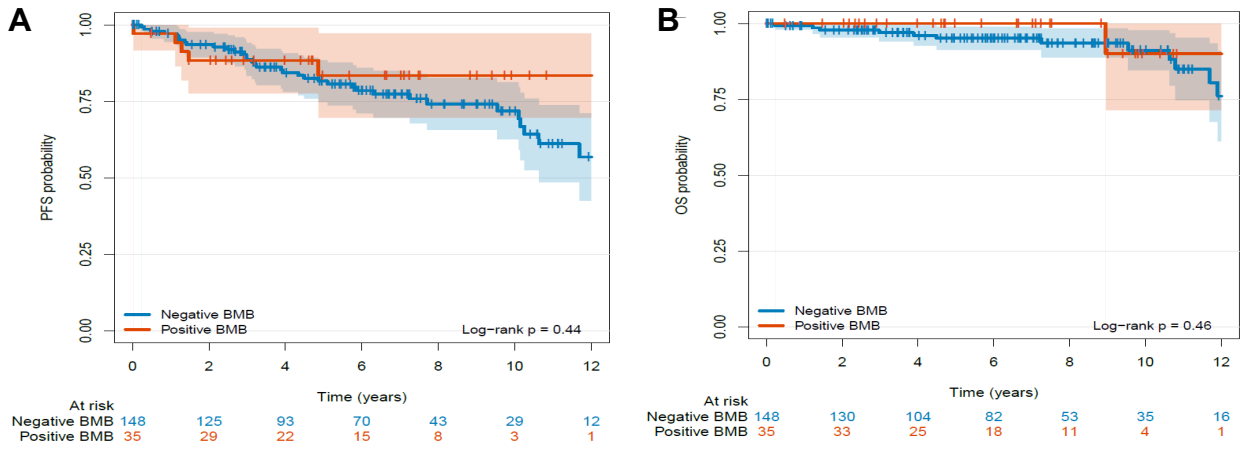

**Supplemental Figure 2.** Kaplan-Meier analysis (A: PFS, B: OS) for patients without evidence for BMI by PET. Color bands indicate 95% CI. There was no association between BMI by BMB alone and patient outcome ( $p = 0.44$  and  $0.46$ , respectively).

**Supplemental Table 1.** Clinical characteristics of patients upstaged to stage IV when additionally considering BMB findings

| <b>PET stage</b> | <b>Number of lymph node/ lesions</b> | <b>The longest diameter of largest involved node/ lesion (cm)</b> | <b>FLIPI score</b> | <b>Initial treatment regime</b> | <b>Progression -free survival (years)</b> | <b>Prognosis</b> | <b>Detected by BMB</b> |
|------------------|--------------------------------------|-------------------------------------------------------------------|--------------------|---------------------------------|-------------------------------------------|------------------|------------------------|
| <b>Stage I</b>   |                                      |                                                                   |                    |                                 |                                           |                  |                        |
| Patient 1        | 1                                    | 3.6                                                               | Intermediate       | R-CHOP                          | 9.9                                       | Alive            | BMB                    |
| Patient 2        | 1                                    | 1.2                                                               | Intermediate       | Rituximab                       | 8.8                                       | Alive            | BMB                    |
| Patient 3        | 1                                    | 2.8                                                               | Low                | Observation                     | 4.7                                       | Alive            | BMB (< 5%)             |
| Patient 4        | None                                 | Not available                                                     | Intermediate       | Methotrexate                    | 2.9                                       | Alive            | Flow cytometry         |
| <b>Stage II</b>  |                                      |                                                                   |                    |                                 |                                           |                  |                        |
| Patient 5        | 4                                    | 7.8                                                               | Intermediate       | R-CHOP                          | 5.7                                       | Alive            | Flow cytometry         |
| Patient 6        | 6                                    | 2.4                                                               | Low                | Rituximab                       | 4.6                                       | Alive            | BMB (15%)              |

**Supplemental Table 2. Role of PET for detecting BMI in FL.** Summary of previous and current study findings.

| Ref           | N                    | PET-positive criteria                                                                                           | CT criteria for BMI detection by PET                                                                                         | BMB and PET result (N)                                            | Comments                                                                                                                                          | Prognosis                                                                                             |
|---------------|----------------------|-----------------------------------------------------------------------------------------------------------------|------------------------------------------------------------------------------------------------------------------------------|-------------------------------------------------------------------|---------------------------------------------------------------------------------------------------------------------------------------------------|-------------------------------------------------------------------------------------------------------|
| (24)          | 68                   | Either focal or diffuse                                                                                         | Not reported                                                                                                                 | BMB+/PET+, 16<br>BMB+/PET-, 0<br>BMB-/PET+, 17<br>BMB-/PET-, 35   | -Visual analysis: PPV 43%<br>-Tested various SUV metrics (e.g. SUVmean > 2.7: sens 68%, PPV 100%)                                                 | -Median FU 46 mos<br>-BM SUVmean > 2.7 associated with a lower treatment free probability             |
| (25)          | 48<br>(Baseline PET) | Either focal or diffuse                                                                                         | Not specified                                                                                                                | BMB+/PET+, 13<br>BMB+/PET-, 11<br>BMB-/PET+, 20<br>BMB-/PET-, 4   | -Visual analysis<br>-PET sens 46%                                                                                                                 | Not reported                                                                                          |
| (20)          | 57                   | Either focal or diffuse                                                                                         | Exclude findings whose FDG uptake is explained by CT findings or clinical histology (e.g. GCFS)                              | BMB+/PET+, 16<br>BMB+/PET-, 8<br>BMB-/PET+, 5<br>BMB-/PET-, 28    | -Visual analysis<br>Also included N=106 with other lymphoma entities<br>-Most pts in whom PET failed to detect BMI were already in advanced stage | Not reported                                                                                          |
| (23)          | 41                   | Either focal or diffuse                                                                                         | "Bone involvement also assessed on concurrent contrast CT"                                                                   | BMB+/PET+, 5<br>BMB+/PET-, 11<br>BMB-/PET+, 2<br>BMB-/PET-, 23    | -Small sample<br>-CT criteria not entirely clear<br>Tested various SUV metrics (e.g., SUVav* > 2.0: sens 58%, spec 96%)                           | Not available                                                                                         |
| (26)          | 142                  | Not reported                                                                                                    | Not reported                                                                                                                 | BMB+/PET+, 24<br>BMB+/PET-, 46<br>BMB-/PET+, 10<br>BMB-/PET-, 62  | -Visual analysis: PET sens 34.3%, PPV 70.6%                                                                                                       | Not available                                                                                         |
| Current study | 261                  | -Focal uptake (alone or in combination with diffuse)<br>-Diffuse uptake <i>per se</i> NOT considered sufficient | Only considered focal uptake NOT explained by any concurrent CT abnormality ( <i>such as benign bone lesion, fractures</i> ) | BMB+/PET+, 46<br>BMB+/PET-, 35<br>BMB-/PET+, 32<br>BMB-/PET-, 148 | -Visual analysis                                                                                                                                  | -Median FU 6.0 yrs<br>-BMI+ by PET is an independent predictor of PFS and OS in multivariate analysis |

# Only focal uptake pattern was considered positive at PET/CT, \* Focally and diffuse uptake pattern were considered positive at PET/CT; BMB, bone marrow biopsy; NR, not reported; PPV, positive predictive value; NPV, negative predictive value.
